# Supplementary material for: Toona Sinensis ameliorates insulin resistance via AMPK and PPARγ pathways
Source: Royal Society of Chemistry journal article supplement (doi:10.1039/c5fo00056d), 2015-01-01
Supplement: c5fo00056d1.pdf [file c5fo00056d1.pdf]

**Supplementary Table 1: Composition of High fat diet**

| Ingredient             | g    | Kcal |
|------------------------|------|------|
| Maltodextrin           | 202  | 808  |
| Sucrose                | 109  | 436  |
| Lard                   | 334  | 3006 |
| Casein                 | 310  | 1240 |
| AIN-76 Vitamin mixture | 10   | 0    |
| AIN-76 Mineral mixture | 35   | 0    |
| Total                  | 1000 | 5490 |

**Supplementary Table 2: High fat diet-induced obese phenotype**

|     | Body weight (g) |                 | Energy intake<br>(Kcal/day) | Blood Glucose<br>(mmol/L)<br>13-week-old | Serum insulin<br>( $\mu$ U/ml)<br>13-week-old |
|-----|-----------------|-----------------|-----------------------------|------------------------------------------|-----------------------------------------------|
|     | 6-week-old      | 13-week-old     |                             |                                          |                                               |
| CON | 22.0 $\pm$ 1.4  | 26.1 $\pm$ 1.7  | 11 $\pm$ 1.7                | 5 $\pm$ 0.4                              | 8.2 $\pm$ 2.7                                 |
| HFD | 22.8 $\pm$ 1.8  | 30.2 $\pm$ 4.1* | 13 $\pm$ 1.9                | 9.77 $\pm$ 2.7*                          | 17.5 $\pm$ 3.9*                               |

Statistical analysis of the difference between two groups was determined by using Student's t-test (SigmaPlot 12.0)

\* P < 0.05.

**Supplementary Table 3: Primer sequences for real-time qPCR**

| <b>Gene name</b> | <b>Forward (5'--&gt;3')</b> | <b>Reverse (5'--&gt;3')</b> |
|------------------|-----------------------------|-----------------------------|
| Sirtuin1         | GCTGACGACTTCGACGACG         | TCGGTCAACAGGAGGTTGTCT       |
| Ppargc1a         | TATGGAGTGACATAGAGTGTGCT     | CCACTTCAATCCACCCAGAAAG      |
| Atp5a1           | TCTCCATGCCTCTAACACTCG       | CCAGGTCAACAGACGTGTCAG       |
| Ndufs8           | AGTGGCGGCAACGTACAAG         | TCGAAAGAGGTAACCTTAGGGTCA    |
| Sdhb             | AATTTGCCATTTACCGATGGGA      | AGCATCCAACACCATAGGTCC       |
| Uqcrc1           | AGACCCAGGTCAGCATCTTG        | GCCGATTCTTTGTTCCCTTGA       |
| Cox5b            | TTCAAGGTTACTTCGCGGAGT       | CGGGACTAGATTAGGGTCTTCC      |
| GADPH            | AGGTCGGTGTGAACGGATTTG       | TGTAGACCATGTAGTTGAGGTCA     |
